# Supplementary material for: Combining Dynamic Network Analysis and Cerebral Carryover Effect to Evaluate the Impacts of Reading Social Media Posts and Science Fiction in the Natural State on the Human Brain
Source: PubMed Central journal article supplement (PMC8901113; doi:10.3389/fnins.2022.827396), 2022-02-21
Supplement: Image_1.pdf [file Image_1.pdf]

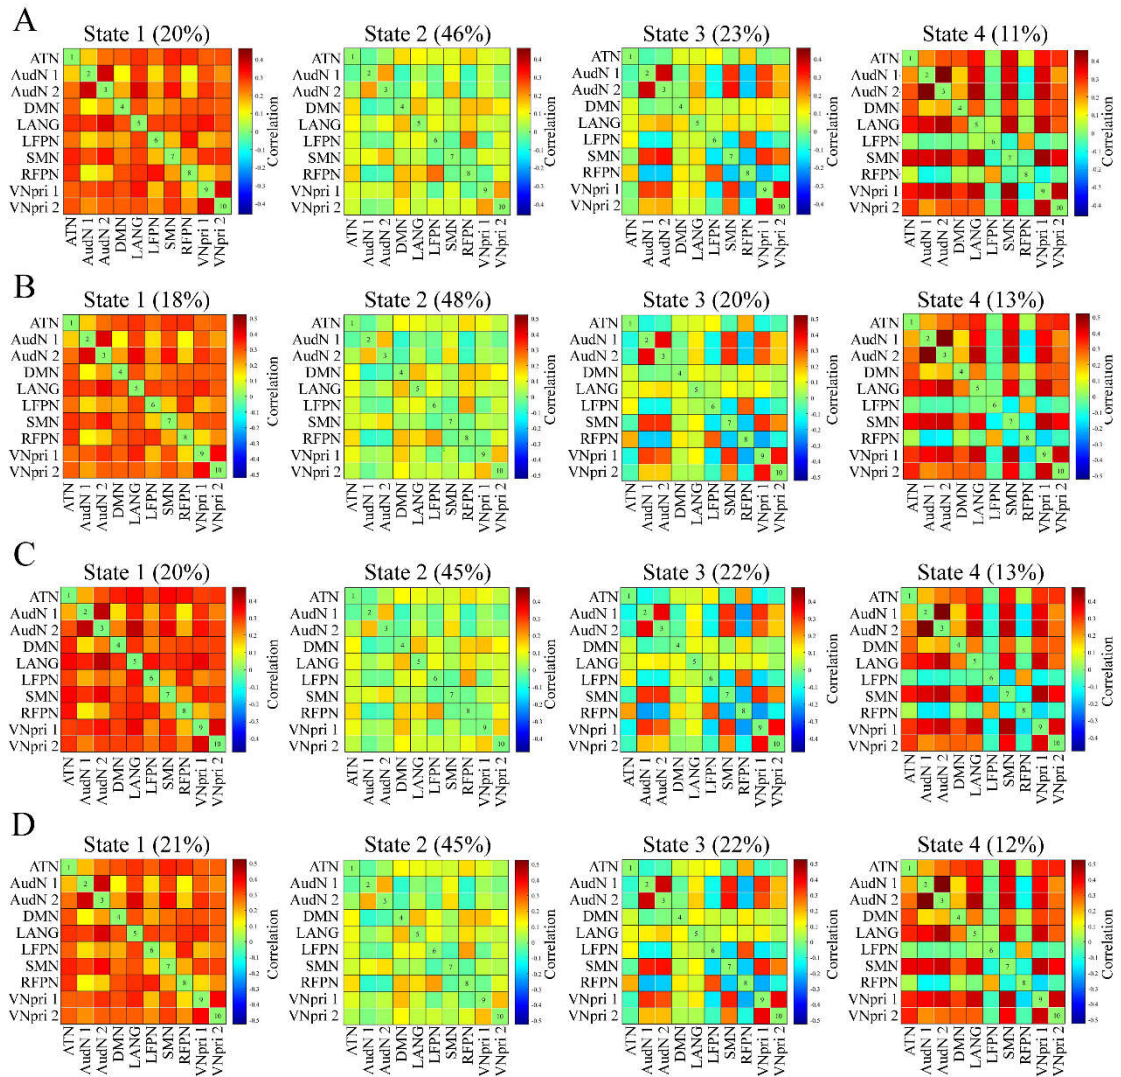

**Fig S1.** Validation test about the influence of Gaussian window alpha value ( $\sigma$ ) on dFNC states. (A) Four dFNC states in the main text, the  $\sigma$  was 3 TRs, and the window size was 25 TRs. (B) Four dFNC states when the  $\sigma$  was 1 TRs, and the window size was 25 TRs. (C) Four dFNC states when the  $\sigma$  was 3 TRs, and the window size was 20 TRs. (D) Four dFNC states when the  $\sigma$  was 3 TRs, and the window size was 30 TRs. We can see that both the states and their frequencies were consistent.
